# Supplementary material for: Efficient water oxidation with organometallic iridium complexes as precatalysts
Source: Royal Society of Chemistry journal article supplement (doi:10.1039/c3cp55101f), 2014-01-01
Supplement: c3cp55101f1.pdf [file c3cp55101f1.pdf]

## Supporting Information

### Efficient Water Oxidation with Organometallic Iridium Complexes as Precatalysts

Anna Lewandowska-Andralojc,<sup>a,§</sup> Dmitry E. Polyansky,<sup>a</sup> Chiu-Hui Wang,<sup>a</sup>  
Wan-Hui Wang,<sup>b,c</sup> Yuichiro Himeda,<sup>b,c</sup> and Etsuko Fujita<sup>a,\*</sup>

<sup>a</sup> Chemistry Department, Brookhaven National Laboratory, Upton, New York 11973-5000, United States

<sup>b</sup> National Institute of Advanced Industrial Science and Technology, Tsukuba Central 5-2, 1-1-1 Higashi, Tsukuba, Ibaraki, 305-8565 Japan

<sup>c</sup> Japan Science and Technology Agency, ACT-C, 4-1-8 Honcho, Kawaguchi, Saitama, 332-0012 Japan.

<sup>§</sup>On leave from the Faculty of Chemistry, Adam Mickiewicz University, Umultowska 89b, Poznan, Poland

\*E-mail: [fujita@bnl.gov](mailto:fujita@bnl.gov) (E.F.)

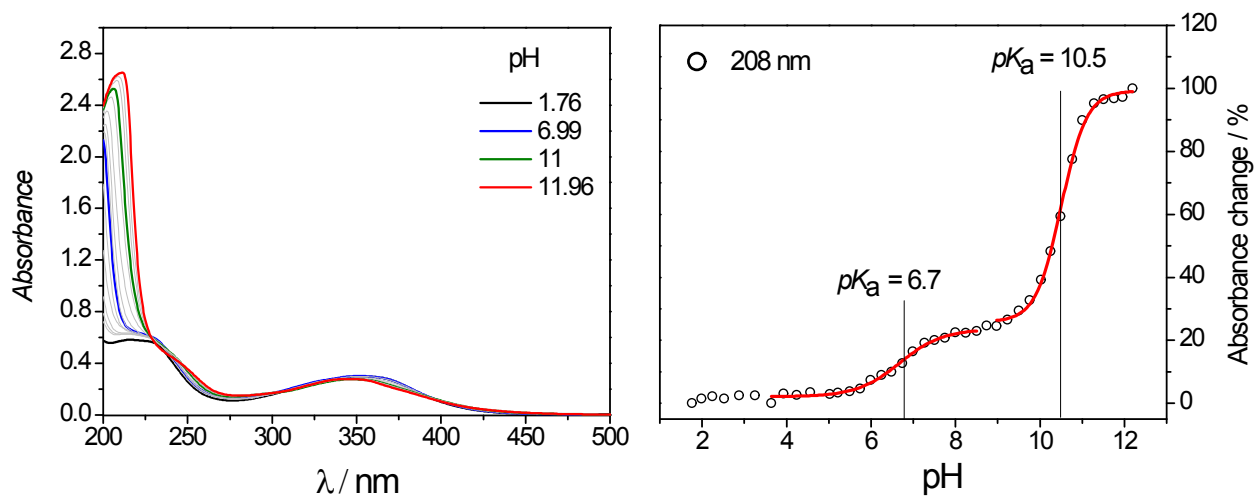

**Fig S1.** a) UV-vis absorption spectra of **2** in a pH titration; b) absorbance changes at single wavelength as a function of pH with Boltzmann fits (red lines).

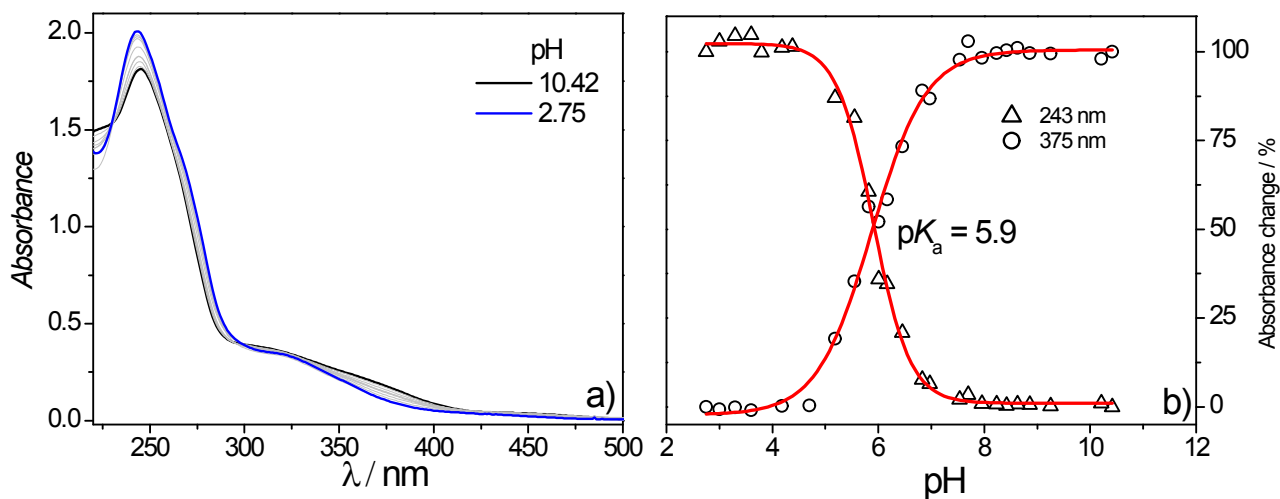

**Fig S2.** a) UV-vis absorption spectra of **4** in a pH titration; b) absorbance changes at single wavelength as a function of pH with Boltzmann fits (red lines).

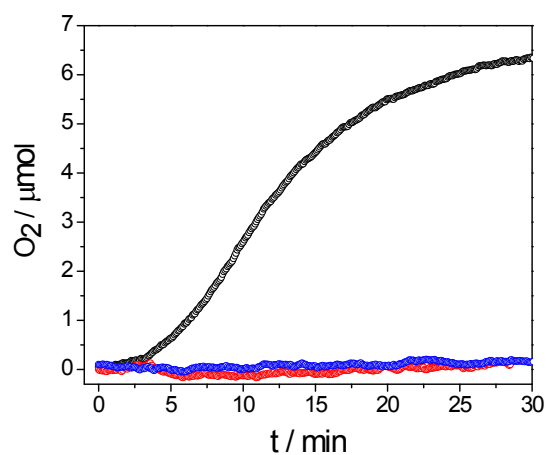

**Fig. S3.**  $O_2$  evolution experiment for **1** (100  $\mu\text{M}$ ) performed with different equivalents of oxidant in acetate buffer (50 mM, pH 5.5), color code: red – 10 eq. of  $\text{NaIO}_4$ ; blue – 20 eq  $\text{NaIO}_4$ ; black – 40 eq.  $\text{NaIO}_4$ .

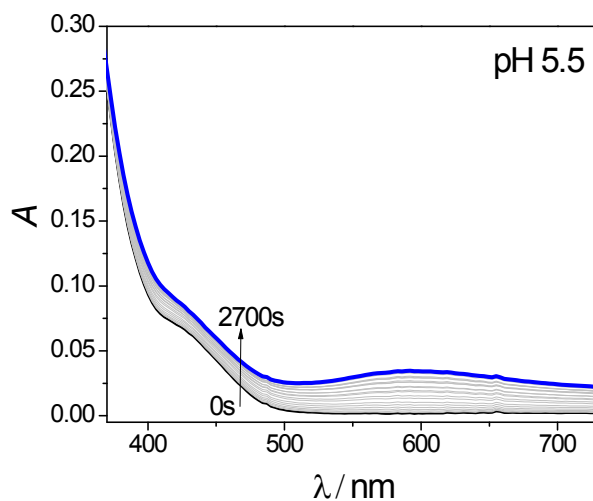

**Fig S4.** UV-vis changes for **4** (230  $\mu\text{M}$ ) after addition 25 eq. of  $\text{NaIO}_4$  in acetate buffer (pH 5.5)

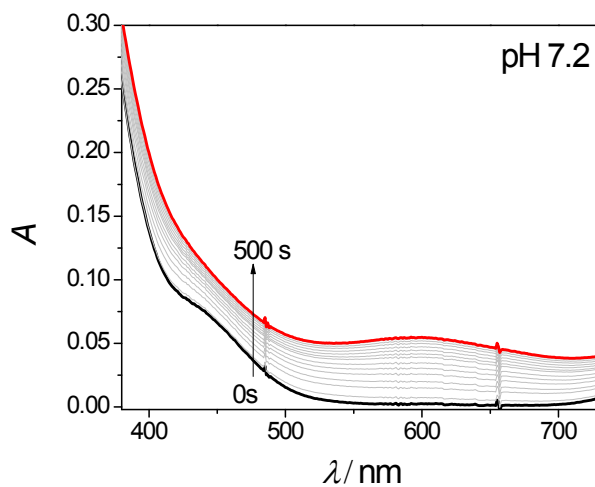

**Fig S5.** UV-vis changes for **4** (230  $\mu\text{M}$ ) after addition 25 eq. of  $\text{NaIO}_4$  in phosphate buffer (pH 7.2)

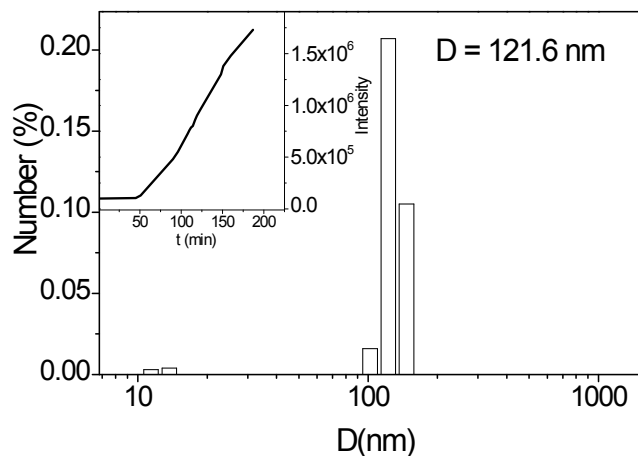

**Fig S6.** Size distribution by a number of nanoparticles for an solution of **1** (1 mM) with 200 eq. of periodate in acetate buffer (50 mM, pH 5.5) after the consumption of the sacrificial oxidant. Inset: light scattering intensity vs. time.

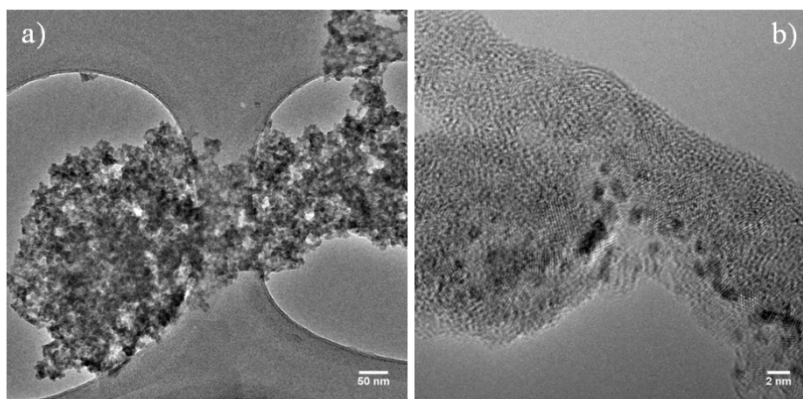

**Fig S7.** TEM images of nanoparticles formed by the reaction of **1** with a) 200 eq. of  $\text{NaIO}_4$  in acetate buffer pH 5.5; b) 50 eq. of  $\text{NaIO}_4$  in water.
